# Supplementary material for: Performance of a System for Rapid Phenotypic Antimicrobial Susceptibility Testing of Gram-Negative Bacteria Directly from Positive Blood Culture Bottles
Source: PubMed Central journal article supplement (PMC10035315; doi:10.1128/jcm.01525-22), 2023-02-28
Supplement: jcm.01525-22-s0001.pdf [file jcm.01525-22-s0001.pdf]

1 Supplementary data

2 **Supplementary Table 1.** Table of discrepancy resolution, with reference MIC before and after  
 3 repeated BMD.

| Species             | Isolate | Antimicrobial                 | Reference data at study start |          | Reference data after discrepancy resolution |          |       |   |
|---------------------|---------|-------------------------------|-------------------------------|----------|---------------------------------------------|----------|-------|---|
|                     |         |                               | Reference MIC                 | Category | Reference MIC                               | Category |       |   |
| <i>A. baumannii</i> | HVI078  | Amikacin                      | =                             | 4        | S                                           | =        | 4     | S |
| <i>A. baumannii</i> | HVI078  | Gentamicin                    | =                             | 4        | S                                           | =        | 8     | R |
| <i>A. baumannii</i> | QM556   | Ciprofloxacin                 | >                             | 4        | R                                           | >        | 4     | R |
| <i>A. baumannii</i> | QM556   | Levofloxacin                  | >                             | 4        | R                                           | >        | 4     | R |
| <i>A. baumannii</i> | QM560   | Gentamicin                    | =                             | 1        | S                                           | =        | 1     | S |
| <i>A. baumannii</i> | QM560   | Meropenem                     | =                             | 16       | R                                           | =        | 0,25  | S |
| <i>A. baumannii</i> | QM561   | Ciprofloxacin                 | >                             | 16       | R                                           | =        | 0,5   | I |
| <i>A. baumannii</i> | QM561   | Levofloxacin                  | >                             | 4        | R                                           | N/A      |       |   |
| <i>C. freundii</i>  | HVI085  | Ceftolozane-tazobactam        | =                             | 8        | R                                           | N/A      |       |   |
| <i>C. freundii</i>  | HVI085  | Piperacillin-tazobactam       | =                             | 32       | R                                           | =        | 32    | R |
| <i>C. koseri</i>    | ORE023  | Amikacin                      | >                             | 256      | R                                           | =        | 0,5   | S |
| <i>E. cloacae</i>   | AR0132  | Meropenem                     | =                             | 16       | R                                           | =        | 8     | I |
| <i>E. cloacae</i>   | AR0136  | Meropenem                     | >                             | 32       | R                                           | =        | 8     | I |
| <i>E. cloacae</i>   | HVI005  | Ceftolozane-tazobactam        | =                             | 0,25     | S                                           | =        | 0,125 | S |
| <i>E. coli</i>      | AR0370  | Amikacin                      | =                             | 8        | S                                           | =        | 8     | S |
| <i>E. coli</i>      | AR0434  | Trimethoprim-sulfamethoxazole | >                             | 8        | R                                           | =        | 16    | R |
| <i>E. coli</i>      | AR0436  | Ceftolozane-tazobactam        | >                             | 64       | R                                           | =        | 4     | R |
| <i>E. coli</i>      | AR0436  | Gentamicin                    | =                             | 4        | R                                           | =        | 2     | S |
| <i>E. coli</i>      | AR0436  | Tigecycline                   | =                             | 1        | R                                           | =        | 0,25  | S |
| <i>E. coli</i>      | AR0437  | Ceftazidime-avibactam         | =                             | 8        | S                                           | =        | 8     | S |
| <i>E. coli</i>      | AR0437  | Trimethoprim-sulfamethoxazole | >                             | 32       | R                                           | =        | 2     | S |
| <i>E. coli</i>      | AR0450  | Ceftazidime-avibactam         | >                             | 16       | R                                           | >        | 32    | R |
| <i>E. coli</i>      | HVI181  | Amoxicillin-clavulanic acid   | =                             | 8        | S                                           | =        | 8     | S |
| <i>E. coli</i>      | HVI181  | Cefuroxime                    | =                             | 8        | I                                           | =        | 16    | R |
| <i>E. coli</i>      | HVI189  | Piperacillin-tazobactam       | =                             | 4        | S                                           | =        | 4     | S |
| <i>E. coli</i>      | HVI190  | Amoxicillin-clavulanic acid   | =                             | 8        | S                                           | =        | 8     | S |
| <i>E. coli</i>      | HVI196  | Amoxicillin-clavulanic acid   | =                             | 8        | S                                           | N/A      |       |   |
| <i>E. coli</i>      | HVI198  | Tobramycin                    | =                             | 4        | R                                           | =        | 0,5   | S |
| <i>E. coli</i>      | HVI212  | Amoxicillin-clavulanic acid   | =                             | 8        | S                                           | =        | 8     | S |
| <i>E. coli</i>      | HVI232  | Amoxicillin-clavulanic acid   | =                             | 8        | S                                           | =        | 8     | S |
| <i>E. coli</i>      | HVI236  | Cefazolin                     | =                             | 8        | R                                           | =        | 4     | I |
| <i>E. coli</i>      | HVI236  | Ampicillin                    | =                             | 16       | R                                           | =        | 16    | R |
| <i>E. coli</i>      | ORE069  | Amoxicillin-clavulanic acid   | =                             | 8        | S                                           | =        | 8     | S |
| <i>E. coli</i>      | ORE070  | Cefazolin                     | =                             | 16       | R                                           | =        | 8     | R |

|                      |        |                               |    |      |   |     |      |   |
|----------------------|--------|-------------------------------|----|------|---|-----|------|---|
| <i>E. coli</i>       | ORE070 | Levofloxacin                  | =  | 0,5  | S | =   | 0,5  | S |
| <i>E. coli</i>       | ORE081 | Amoxicillin-clavulanic acid   | =  | 8    | S | =   | 8    | S |
| <i>E. coli</i>       | ORE098 | Cefuroxime                    | =  | 8    | I | =   | 4    | I |
| <i>E. coli</i>       | ORE104 | Amoxicillin-clavulanic acid   | =  | 8    | S | =   | 8    | S |
| <i>E. coli</i>       | ORE109 | Amoxicillin-clavulanic acid   | =  | 8    | S | =   | 4    | S |
| <i>E. coli</i>       | ORE110 | Trimethoprim-sulfamethoxazole | >  | 64   | R | >   | 64   | R |
| <i>E. coli</i>       | ORE123 | Amoxicillin-clavulanic acid   | =  | 8    | S | =   | 8    | S |
| <i>E. coli</i>       | ORE129 | Amoxicillin-clavulanic acid   | =  | 8    | S | =   | 8    | S |
| <i>E. coli</i>       | ORE129 | Cefuroxime                    | =  | 8    | I | N/A |      |   |
| <i>E. coli</i>       | ORE135 | Amoxicillin-clavulanic acid   | =  | 8    | S | =   | 8    | S |
| <i>E. coli</i>       | QM565  | Amoxicillin-clavulanic acid   | =  | 8    | S | =   | 8    | S |
| <i>E. coli</i>       | QM565  | Amikacin                      | =  | 1    | S | =   | 1    | S |
| <i>H. influenzae</i> | HVI010 | Meropenem                     | <= | 0,03 | S | =   | 0,03 | S |
| <i>K. aerogenes</i>  | HVI116 | Amikacin                      | =  | 64   | R | =   | 2    | S |
| <i>K. aerogenes</i>  | ORE029 | Aztreonam                     | >  | 256  | R | =   | 0,06 | S |
| <i>K. oxytoca</i>    | AR0028 | Cefazolin                     | >  | 32   | R | =   | 8    | R |
| <i>K. oxytoca</i>    | HVI261 | Cefazolin                     | =  | 16   | R | =   | 8    | R |
| <i>K. pneumoniae</i> | AR0010 | Amikacin                      | =  | 8    | S | =   | 8    | S |
| <i>K. pneumoniae</i> | AR0010 | Gentamicin                    | =  | 2    | S | N/A |      |   |
| <i>K. pneumoniae</i> | AR0066 | Amikacin                      | =  | 32   | R | =   | 8    | S |
| <i>K. pneumoniae</i> | AR0076 | Ertapenem                     | =  | 1    | R | =   | 2    | R |
| <i>K. pneumoniae</i> | AR0364 | Trimethoprim-sulfamethoxazole | >  | 8    | R | >   | 64   | R |
| <i>K. pneumoniae</i> | AR0376 | Ertapenem                     | =  | 0,25 | S | N/A |      |   |
| <i>K. pneumoniae</i> | HVI281 | Cefazolin                     | =  | 8    | R | =   | 2    | I |
| <i>K. pneumoniae</i> | ORE142 | Cefuroxime                    | =  | 16   | R | =   | 2    | I |
| <i>K. pneumoniae</i> | ORE144 | Cefuroxime                    | =  | 16   | R | =   | 8    | I |
| <i>K. pneumoniae</i> | ORE146 | Piperacillin-tazobactam       | =  | 32   | R | =   | 16   | R |
| <i>K. pneumoniae</i> | ORE154 | Piperacillin-tazobactam       | >  | 256  | R | N/A |      |   |
| <i>K. pneumoniae</i> | ORE154 | Cefazolin                     | >  | 64   | R | =   | 16   | R |
| <i>K. pneumoniae</i> | ORE171 | Ceftolozane-tazobactam        | =  | 8    | R | =   | 2    | S |
| <i>K. pneumoniae</i> | ORE171 | Piperacillin-tazobactam       | =  | 32   | R | =   | 8    | S |
| <i>K. pneumoniae</i> | QM843  | Trimethoprim-sulfamethoxazole | =  | 0,5  | S | =   | 0,5  | S |
| <i>K. pneumoniae</i> | QM845  | Trimethoprim-sulfamethoxazole | =  | 0,5  | S | =   | 1    | S |
| <i>M. morgani</i>    | AR0519 | Amikacin                      | =  | 16   | R | =   | 8    | S |
| <i>M. morgani</i>    | AR0519 | Ceftazidime-avibactam         | <= | 0,5  | S | =   | 0,5  | S |
| <i>M. morgani</i>    | AR0519 | Cefepime                      | =  | 1    | S | =   | 2    | I |
| <i>M. morgani</i>    | HVI331 | Cefotaxime                    | >  | 8    | R | N/A |      |   |
| <i>M. morgani</i>    | HVI331 | Tobramycin                    | =  | 8    | R | =   | 8    | R |
| <i>M. morgani</i>    | HVI332 | Cefotaxime                    | =  | 0,5  | S | =   | 0,25 | S |
| <i>P. aeruginosa</i> | AR0233 | Cefepime                      | =  | 8    | I | =   | 4    | I |
| <i>P. aeruginosa</i> | AR0233 | Piperacillin-tazobactam       | =  | 16   | I | =   | 16   | I |

|                      |        |                               |    |      |   |    |       |   |
|----------------------|--------|-------------------------------|----|------|---|----|-------|---|
| <i>P. aeruginosa</i> | AR0233 | Ciprofloxacin                 | =  | 1    | R | =  | 0,5   | I |
| <i>P. aeruginosa</i> | AR0233 | Levofloxacin                  | =  | 4    | R | =  | 2     | R |
| <i>P. aeruginosa</i> | AR0257 | Cefepime                      | =  | 8    | I | =  | 8     | I |
| <i>P. aeruginosa</i> | AR0262 | Ciprofloxacin                 | =  | 2    | R | =  | 8     | R |
| <i>P. aeruginosa</i> | AR0445 | Amikacin                      | =  | 64   | R | =  | 64    | R |
| <i>P. aeruginosa</i> | AR0512 | Ciprofloxacin                 | =  | 2    | R | =  | 1     | R |
| <i>P. aeruginosa</i> | AR0512 | Ceftazidime-avibactam         | =  | 8    | S | =  | 4     | S |
| <i>P. aeruginosa</i> | AR0512 | Cefepime                      | =  | 8    | I | =  | 4     | I |
| <i>P. aeruginosa</i> | AR0512 | Ceftazidime                   | =  | 8    | I | =  | 8     | I |
| <i>P. mirabilis</i>  | AR0377 | Ertapenem                     | =  | 4    | R | =  | 0,03  | S |
| <i>P. mirabilis</i>  | BOL043 | Trimethoprim-sulfamethoxazole | =  | 1    | S | =  | 1     | S |
| <i>P. mirabilis</i>  | HVI360 | Gentamicin                    | =  | 4    | R | =  | 2     | S |
| <i>P. mirabilis</i>  | HVI367 | Trimethoprim-sulfamethoxazole | =  | 1    | S | =  | 2     | S |
| <i>P. mirabilis</i>  | HVI370 | Amikacin                      | =  | 8    | S | =  | 8     | S |
| <i>P. mirabilis</i>  | HVI373 | Gentamicin                    | =  | 4    | R | =  | 1     | S |
| <i>P. mirabilis</i>  | HVI374 | Gentamicin                    | =  | 0,5  | S | =  | 0,5   | S |
| <i>P. mirabilis</i>  | HVI380 | Trimethoprim-sulfamethoxazole | =  | 2    | S | =  | 0,5   | S |
| <i>P. mirabilis</i>  | ORE262 | Aztreonam                     | <= | 0,03 | S | <= | 0,03  | S |
| <i>P. mirabilis</i>  | ORE262 | Ceftolozane-tazobactam        | =  | 0,5  | S | =  | 0,5   | S |
| <i>P. vulgaris</i>   | HVI387 | Ceftazidime                   | <= | 0,25 | S | =  | 0,06  | S |
| <i>P. vulgaris</i>   | HVI387 | Cefotaxime                    | =  | 0,03 | S | <= | 0,016 | S |
| <i>P. vulgaris</i>   | HVI387 | Trimethoprim-sulfamethoxazole | <= | 0,06 | S | =  | 0,06  | S |
| <i>S. marcescens</i> | ORE058 | Tobramycin                    | =  | 4    | R | =  | 2     | S |

4  
5 \* For results denoted as N/A, no mode value could be obtained. Since a comparison  
6 between AStar and the reference method cannot be performed for these datapoints,  
7 these datapoints have been removed in accordance with the ISO standard 20776-2:2007  
8 (1).

9  
10  
11  
12  
13  
14  
15  
16  
17

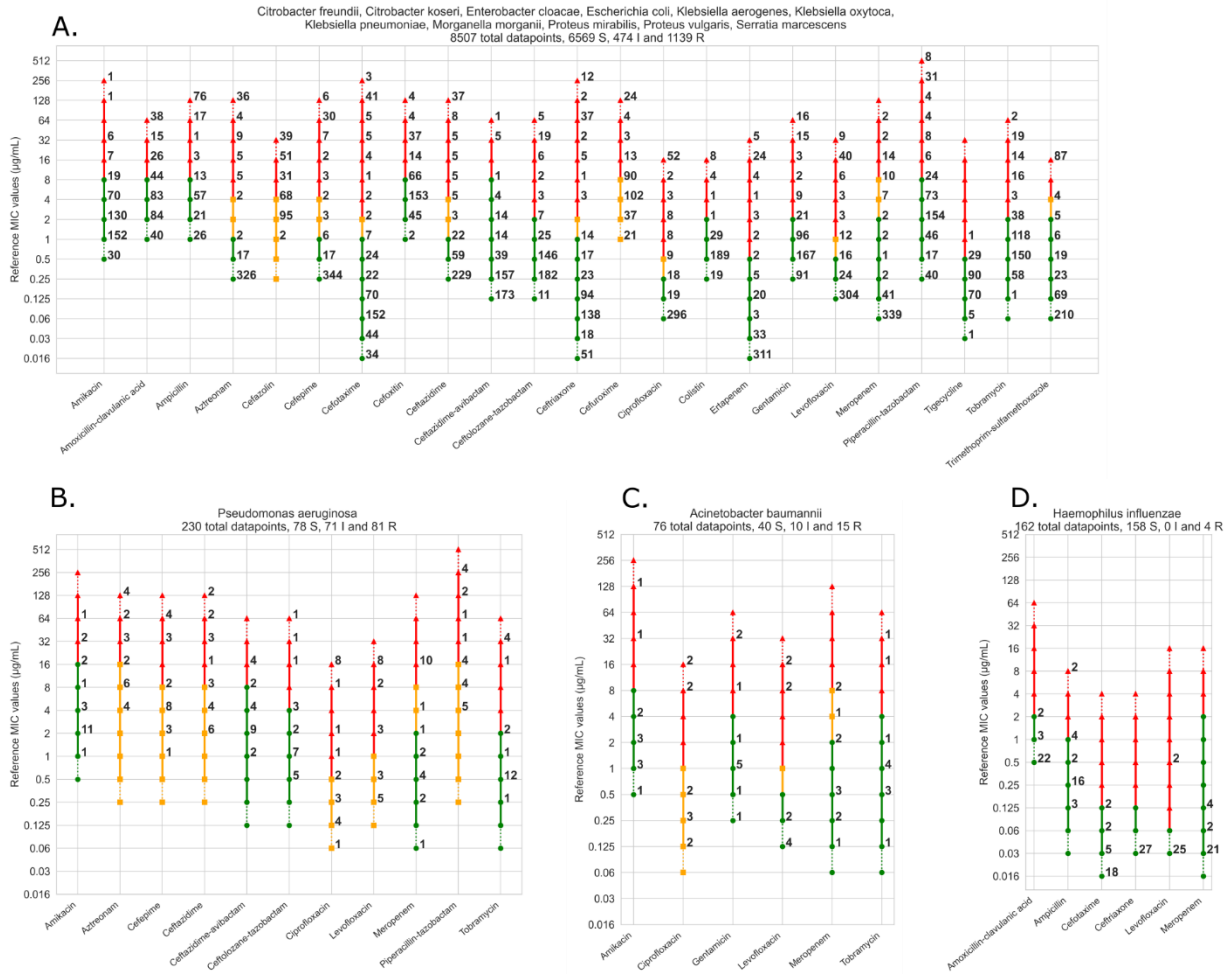

18  
 19 **Supplementary Figure 1.** The distribution of the reference MICs for the included study strains  
 20 displayed along the reportable antimicrobial ranges of the ASTar BC G- Kit. Where reference MIC  
 21 ranges were broader than those of ASTar, they were truncated to ASTar ranges. In some  
 22 instances, reference MIC range was shorter than that of ASTar, primarily concerning CDC  
 23 isolates. The numbers indicate the number of strains with a given reference MIC. Off-scale  
 24 reference MICs are indicated as dashed lines ( $\leq$  and  $>$ ), e.g. ASTar BC G- Kit reportable range for  
 25 amikacin is 0.5 – 128  $\mu\text{g/mL}$ . Green indicates ‘S’, yellow ‘I’, and red ‘R’.

26

27

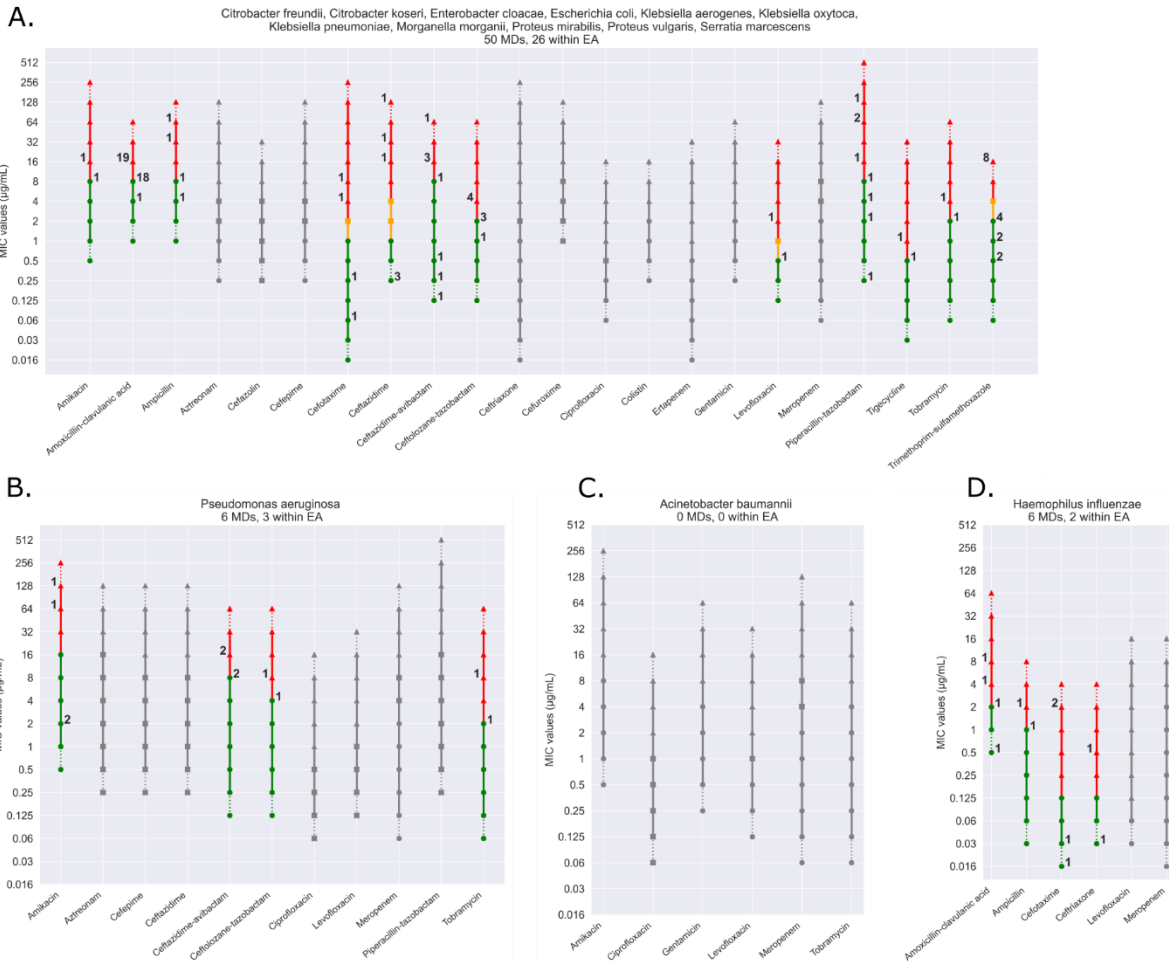

28  
 29 **Supplementary Figure 2.**  
 30 Major discrepancy results from analysis using ASTar BC G- Kit software version 1.5 and  
 31 interpreted according to discrepancy calculation strategy 1 and after discrepancy  
 32 resolution. Where reference MIC ranges were broader than those of ASTar, they were  
 33 truncated to ASTar ranges. In some instances reference MIC range was shorter than that  
 34 of ASTar, primarily concerning CDC isolates. ASTar MIC results are presented to the left  
 35 of the range line and corresponding reference MIC values are indicated to the right.  
 36 Green indicates 'S', yellow 'I', and red 'R'.

37

38 **A. Enterobacterales**

39 Major discrepancies for Enterobacterales of more than one MIC value from reference  
 40 MIC (non EA) were 1 amoxicillin-clavuanic acid, 2 ampicillin, 2 cefotaxime, 3  
 41 ceftazidime, 3 ceftazidime-avibactam, 1 ceftolozane-tazobactam, 1 levofloxacin, and 3

42 piperacillin-tazobactam.

43 **B. *P. aeruginosa***

44 Major discrepancies for *P. aeruginosa* of more than one MIC value from reference MIC  
45 (non EA) were 2 amikacin and 1 tobramycin.

46 **C. *A. baumannii***

47 No major discrepancies were registered for *A. baumannii*.

48 **D. *H. influenzae***

49 Major discrepancies for *H. influenzae* of more than one MIC value from reference MIC  
50 (non EA) were 1 ceftriaxone, 2 cefotaxime, and 1 amoxicillin-clavulanic acid.

51

52

53

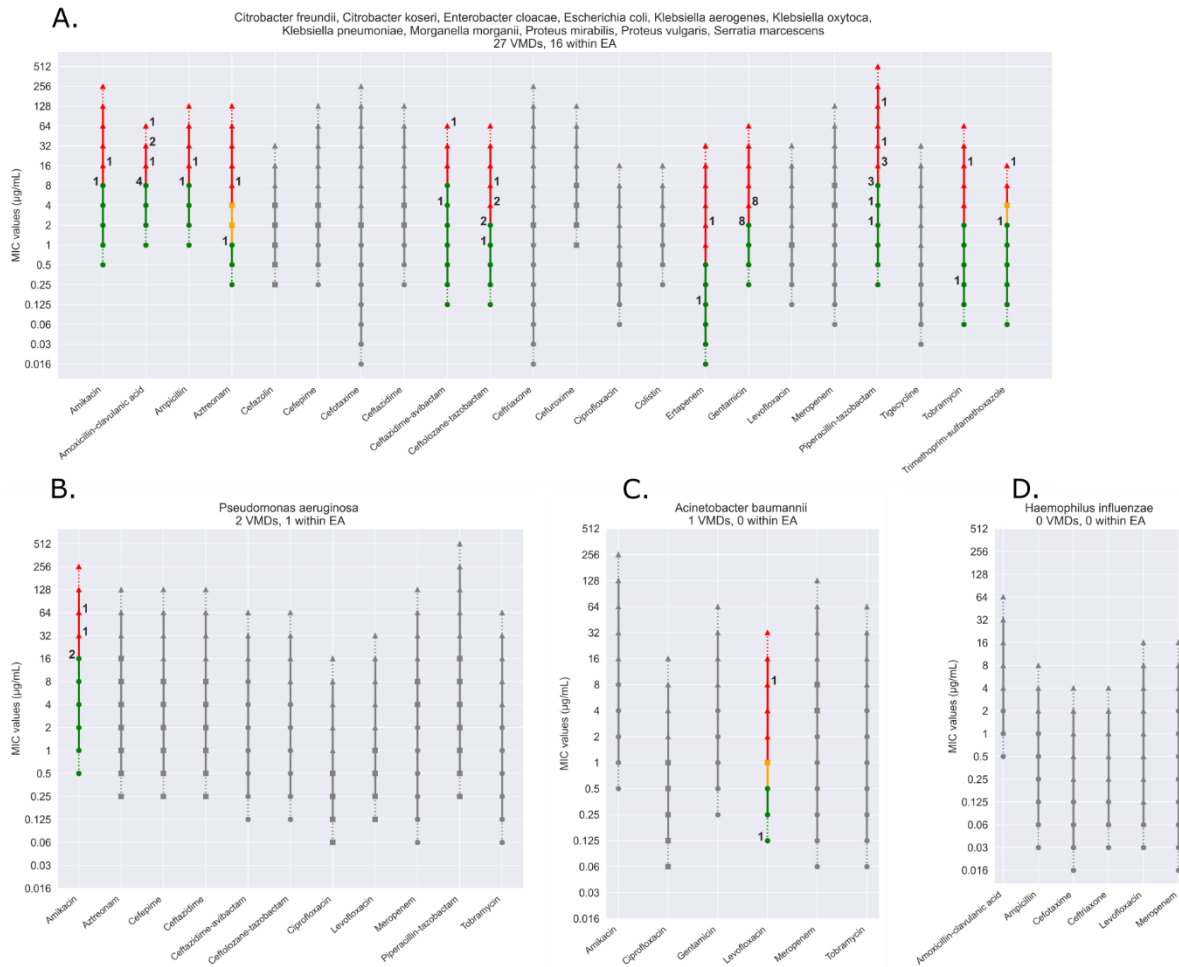

54  
55

**Supplementary Figure 3.**

56 Very major discrepancy results from analysis using ASTar BC G- Kit software version  
57 1.5 and interpreted according to discrepancy calculation strategy 1 and after discrepancy  
58 resolution. Where reference MIC ranges were broader than those of ASTar, they were  
59 truncated to ASTar ranges. In some instances reference MIC range was shorter than that  
60 of ASTar, primarily concerning CDC isolates. ASTar MIC results are presented to the left  
61 of the range line and corresponding reference MIC values are indicated to the right.  
62 Green indicates 'S', yellow 'I', and red 'R'.

**A. Enterobacterales**

64 Very major discrepancies for Enterobacterales of more than one MIC value from  
65 reference MIC (non EA) were 3 amoxicillin-clavulanic acid, 1 aztreonam, 1  
66 ceftazidime-avibactam, 1 ceftolozane-tazobactam, 1 ertapenem, 2 piperacillin-  
67 tazobactam, 1 tobramycin, and 1 trimethoprim-sulfamethoxazole.

68 **B. *P. aeruginosa***

69 Very major discrepancies for *P. aeruginosa* of more than one MIC value from reference  
70 MIC (non EA) were 1 amikacin.

71 **C. *A. baumannii***

72 Very major discrepancies for *A. baumannii* of more than one MIC value from reference  
73 MIC (non EA) were 1 levofloxacin.

74 **D. *H. influenzae***

75 No very major discrepancies were registered for *H. influenzae*.

76

77 **Supplementary Table 2.** Presentation of performance characteristics data for screening  
78 agent cefoxitin. MIC >8 µg/mL is interpreted as a positive screening test for AmpC, using  
79 BMD for reference.

80

| <b>Antimicrobial agent</b> | <b>Positive agreement</b> | <b>Negative agreement</b> |
|----------------------------|---------------------------|---------------------------|
| Cefoxitin                  | 55/59 (93.2%)             | 245/266 (92.1%)           |

81

82 Positive agreement (proportion of correctly reported AmpC-positive isolates) =  
83 number of isolates tested positive by the ASTar System divided by number of  
84 isolates tested positive by reference method.

85

86 Negative agreement (Proportion of correctly reported AmpC-negative isolates) =  
87 number of isolates correctly tested negative by the ASTar System divided by  
88 number of isolates tested negative verified by reference method.

89

90

91

92

93

94

95



96 **Supplementary Table 3.** Listed cefoxitin results in non-agreement with the reference,  
 97 including MIC values. The total number of datapoints for cefoxitin are 325, and number of  
 98 datapoints in agreement are 300.

99

| Species                      | Isolate | Agreement          |           |   | MIC Value          |           |    |
|------------------------------|---------|--------------------|-----------|---|--------------------|-----------|----|
|                              |         | AS <sup>T</sup> ar | Reference |   | AS <sup>T</sup> ar | Reference |    |
| <i>Escherichia coli</i>      | HVI177  | POS                | NEG       | = | 16                 | =         | 4  |
| <i>Escherichia coli</i>      | HVI199  | POS                | NEG       | = | 16                 | =         | 4  |
| <i>Escherichia coli</i>      | HVI217  | POS                | NEG       | = | 16                 | =         | 4  |
| <i>Escherichia coli</i>      | HVI219  | POS                | NEG       | = | 16                 | =         | 4  |
| <i>Proteus mirabilis</i>     | HVI360  | POS                | NEG       | = | 16                 | =         | 4  |
| <i>Escherichia coli</i>      | ORE126  | POS                | NEG       | = | 16                 | =         | 4  |
| <i>Escherichia coli</i>      | ORE129  | POS                | NEG       | = | 32                 | =         | 4  |
| <i>Proteus mirabilis</i>     | ORE255  | POS                | NEG       | = | 16                 | =         | 4  |
| <i>Escherichia coli</i>      | P02046  | POS                | NEG       | = | 16                 | =         | 4  |
| <i>Escherichia coli</i>      | P02055  | POS                | NEG       | = | 16                 | =         | 4  |
| <i>Escherichia coli</i>      | HVI189  | POS                | NEG       | = | 16                 | =         | 8  |
| <i>Escherichia coli</i>      | HVI192  | POS                | NEG       | = | 16                 | =         | 8  |
| <i>Escherichia coli</i>      | HVI231  | POS                | NEG       | = | 16                 | =         | 8  |
| <i>Escherichia coli</i>      | HVI234  | POS                | NEG       | = | 16                 | =         | 8  |
| <i>Proteus mirabilis</i>     | HVI374  | POS                | NEG       | = | 16                 | =         | 8  |
| <i>Proteus mirabilis</i>     | HVI380  | POS                | NEG       | = | 16                 | =         | 8  |
| <i>Escherichia coli</i>      | ORE075  | POS                | NEG       | = | 16                 | =         | 8  |
| <i>Escherichia coli</i>      | ORE077  | POS                | NEG       | = | 16                 | =         | 8  |
| <i>Escherichia coli</i>      | ORE085  | POS                | NEG       | = | 16                 | =         | 8  |
| <i>Escherichia coli</i>      | ORE133  | POS                | NEG       | = | 16                 | =         | 8  |
| <i>Escherichia coli</i>      | QM565   | POS                | NEG       | = | 16                 | =         | 8  |
| <i>Klebsiella pneumoniae</i> | HVI291  | NEG                | POS       | = | 8                  | =         | 16 |
| <i>Escherichia coli</i>      | P02018  | NEG                | POS       | = | 4                  | =         | 16 |
| <i>Escherichia coli</i>      | P02026  | NEG                | POS       | = | 8                  | =         | 16 |
| <i>Klebsiella pneumoniae</i> | P02067  | NEG                | POS       | = | 8                  | =         | 16 |

101

102 **Supplementary Table 4.** Reproducibility of ASTar BC G- Kit per antimicrobial, pooled  
 103 across instruments.

| Antimicrobial agent           | Results that fall within 1 dilution (+/-1) of the mode result divided by total number of results |                                    |
|-------------------------------|--------------------------------------------------------------------------------------------------|------------------------------------|
|                               | Best-case <sup>a</sup> totals (%)                                                                | Worst-case <sup>b</sup> totals (%) |
| Ampicillin                    | 71/71 (100%)                                                                                     | 71/71 (100%)                       |
| Amoxicillin-clavulanic acid   | 105/105 (100%)                                                                                   | 105/105 (100%)                     |
| Piperacillin-tazobactam       | 155/155 (100%)                                                                                   | 155/155 (100%)                     |
| Cefazolin                     | 53/53 (100%)                                                                                     | 53/53 (100%)                       |
| Cefepime                      | 68/68 (100%)                                                                                     | 68/68 (100%)                       |
| Cefotaxime                    | 156/156 (100%)                                                                                   | 156/156 (100%)                     |
| Cefoxitin                     | 70/70 (100%)                                                                                     | 70/70 (100%)                       |
| Ceftazidime                   | 104/104 (100%)                                                                                   | 92/104 (88.5%)                     |
| Ceftazidime-avibactam         | 138/138 (100%)                                                                                   | 138/138 (100%)                     |
| Ceftolozane-tazobactam        | 156/156 (100%)                                                                                   | 156/156 (100%)                     |
| Ceftriaxone                   | 155/156 (99.4%)                                                                                  | 154/156 (98.7%)                    |
| Cefuroxime                    | 70/70 (100%)                                                                                     | 70/70 (100%)                       |
| Ertapenem                     | 103/104 (99.0%)                                                                                  | 93/104 (89.4%)                     |
| Meropenem                     | 78/87 (89.7%)*                                                                                   | 78/87 (89.7%)                      |
| Aztreonam                     | 52/52 (100%)                                                                                     | 52/52 (100%)                       |
| Ciprofloxacin                 | 87/87 (100%)                                                                                     | 86/87 (98.9%)                      |
| Levofloxacin                  | 122/122 (100%)                                                                                   | 122/122 (100%)                     |
| Amikacin                      | 156/156 (100%)                                                                                   | 148/156 (94.9%)                    |
| Gentamicin                    | 139/139 (100%)                                                                                   | 137/139 (98.6%)                    |
| Tobramycin                    | 156/156 (100%)                                                                                   | 156/156 (100%)                     |
| Tigecycline                   | 52/53 (98.1%)                                                                                    | 52/53 (98.1%)                      |
| Colistin                      | 70/70 (100%)                                                                                     | 70/70 (100%)                       |
| Trimethoprim-sulfamethoxazole | 88/88 (100%)                                                                                     | 73/88 (83.0%)                      |

104

105 a) Best case calculation for reproducibility assuming any off-scale results are within one dilution from the  
 106 adjacent on-scale result.

107 b) Worst case calculation for reproducibility assuming any off-scale results are more than one dilution from the

108 adjacent on-scale result.

109

110 \* A reproducibility of 95.4% can be calculated if the reference MIC for one *E. cloacae* isolate is used instead of

111 mode MIC.

112
